# Supplementary material
Source: Springer Nature journal article supplement (https://www.springermedizin.de/resource/supplementary/12893_2010_196_MOESM1_ESM.pdf/9511766)
Supplement: MOESM1 [file 9511766]

Incidence colon cancer (n = 7000)

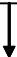

To be assessed for eligibility (n = 3500)

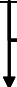

Not meeting randomisation criteria (n = 2400)  
Refusal to participate (n = 75)  
Other reasons (n = 25)

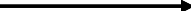

To be randomised (n = 1000)

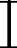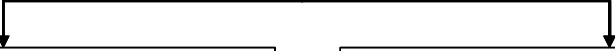

To be allocated to intervention (n = 500)  
- Receive allocated intervention  
- not receive allocated intervention

To be allocated to intervention (n = 500)  
- Receive allocated intervention  
- not receive allocated intervention

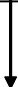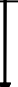

To be lost to follow up (n = 13)

To be lost to follow up (n = 13)

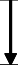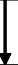

To be analysed (n = 487)

To be analysed (n = 487)
